# Supplementary material for: Achieving accelerated osteogenic differentiation via novel magnesium silicate hollow spheres
Source: Royal Society of Chemistry journal article supplement (doi:10.1039/c5nj02189h), 2015-01-01
Supplement: c5nj02189h1.pdf [file c5nj02189h1.pdf]

**Supporting Information for**

**Achieving accelerated osteogenic differentiation via  
novel magnesium silicate hollow spheres**

*Baixiang Wang, Yu Wang, Chuanxia Liu, Xiaoxia Feng, Guoli Yang, and Huiming  
Wang\**

Affiliated Hospital of Stomatology, Medical College, Zhejiang University, Hangzhou  
310000, P. R. China.

Email: whmzju@126.com; Fax: +86-571-87217008.

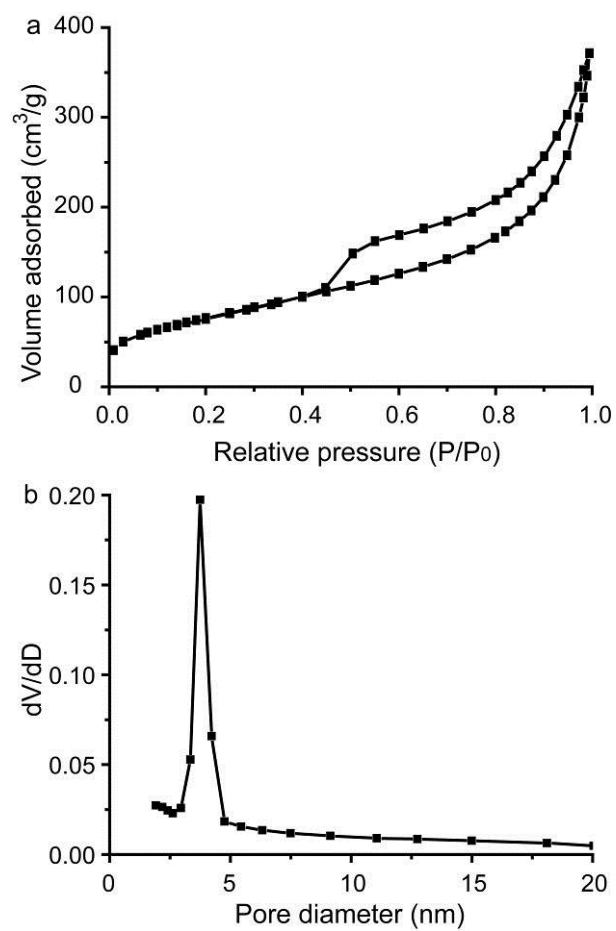

**Figure S1.** Nitrogen adsorption-desorption isotherms and pore size distribution of MgSiO<sub>3</sub> hollow spheres.

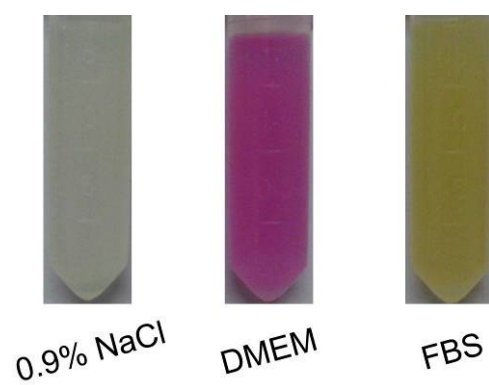

**Figuer S2.** Photos of  $\text{MgSiO}_3$  hollow spheres in various cell media (200  $\mu\text{g/mL}$ ).

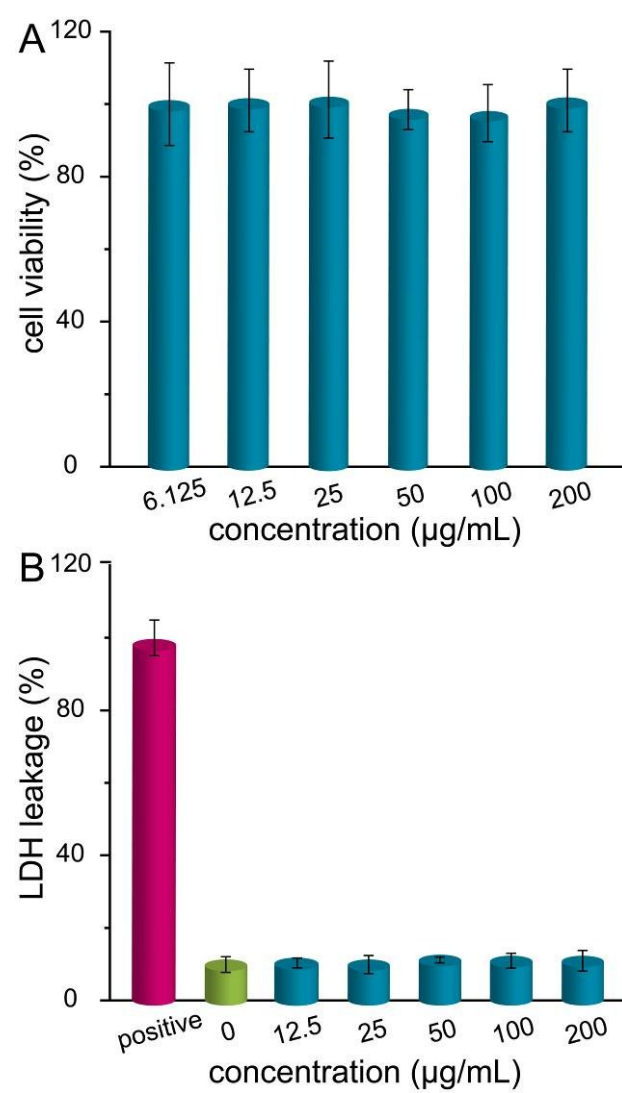

**Figure S3.** Cell viability (A) and LDH leakage (B) of MC3T3-E1 cells 24 h after incubation with MgSiO<sub>3</sub> hollow spheres.

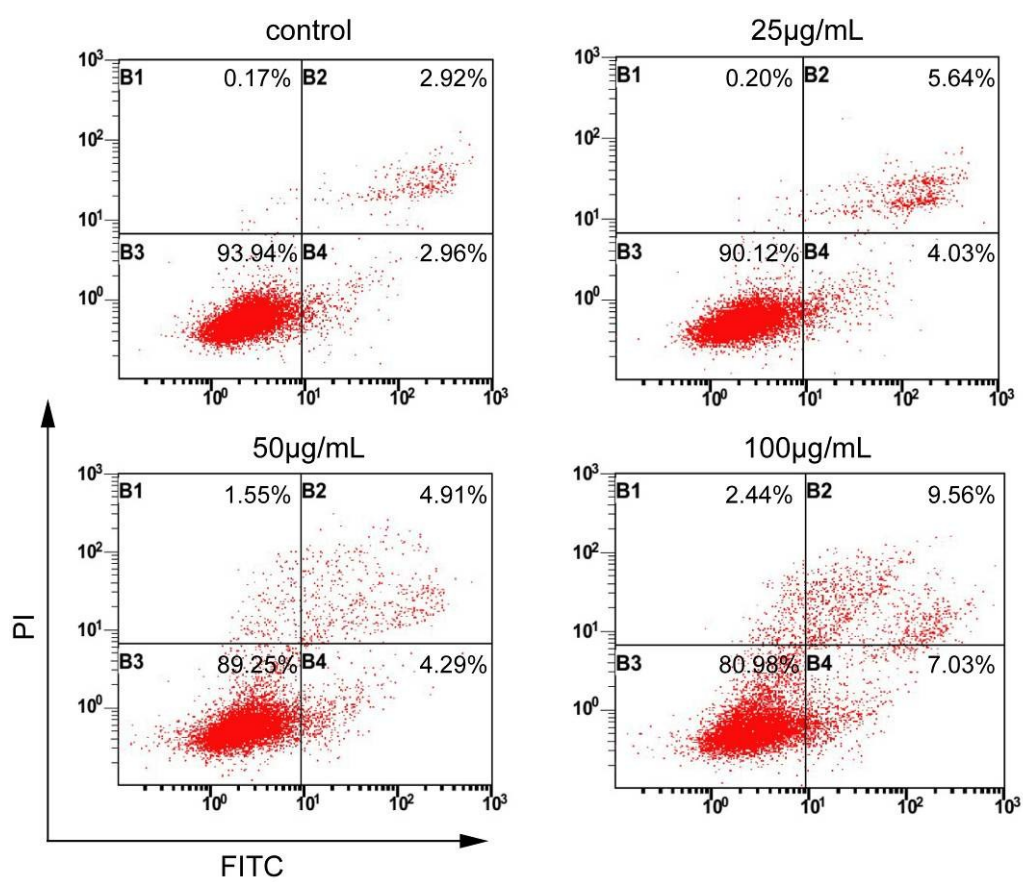

**Figure S4.** Apoptosis analysis of MC3T3-E1 cells incubated with MgSiO<sub>3</sub> hollow spheres via flow cytometer.

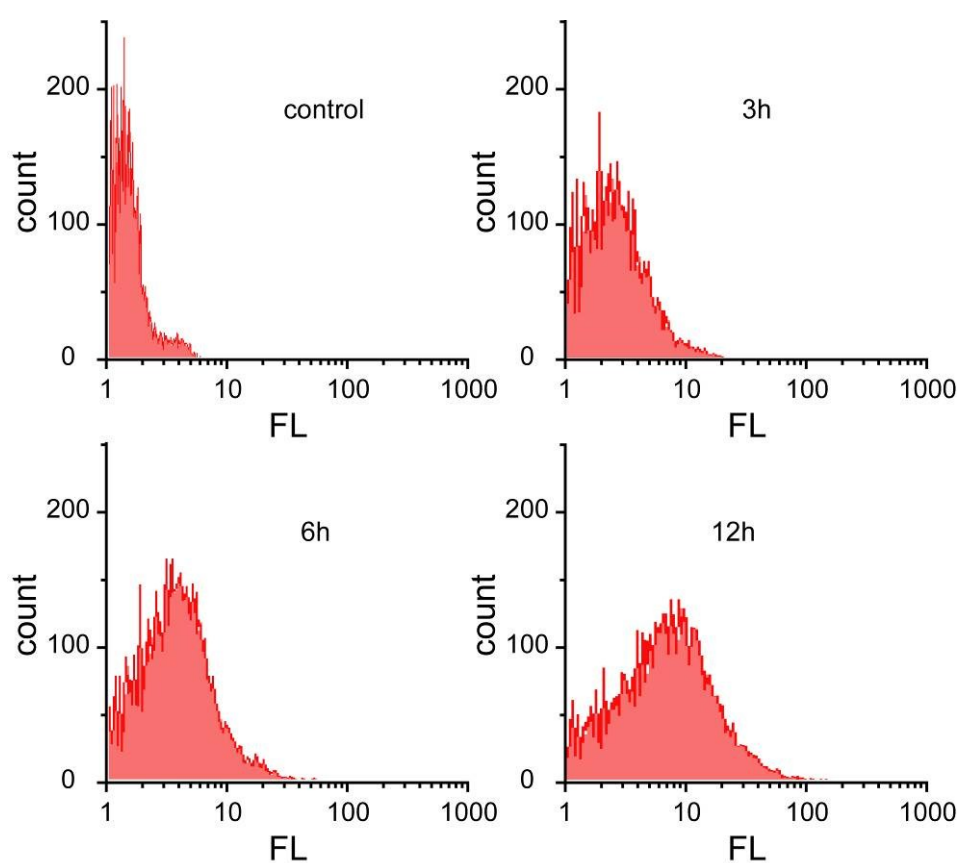

**Figure S5.** Time-dependent cellular internalization of FITC-modified  $\text{MgSiO}_3$  hollow spheres via flow cytometer.
